# Supplementary material for: Diversity in the emergency care for febrile children in Europe: a questionnaire study
Source: PubMed Central journal article supplement — BMJ Paediatr Open. 2019 Jun 27;3(1):e000456. doi: 10.1136/bmjpo-2019-000456 (PMC6613846; doi:10.1136/bmjpo-2019-000456), 2019-06-27

# Information about hospital and healthcare organisation

## 1. Email address \*

---

## 2. Hospital, name and country

*Mark only one oval.*

- SMH, Londen, UK
- LIV, Liverpool, UK
- UNEW, Newcastle, UK
- EMC, Rotterdam, the Netherlands
- NKUA, Athens, Greece
- SERGAS, Santiago de Compostela, Spain
- RUMC, Nijmegen, the Netherlands
- MUG, Graz, Austria
- RSU, Riga, Latvia
- LMU, München, Germany
- UKCL, Ljubljana, Slovenia

## 3. What is the upper age limit in years at your ED defined as paediatric?

*Mark only one oval.*

- 16
- 18
- Other: \_\_\_\_\_

## 4. Catchment area

Number of pediatric inhabitants

---

## 5. Patient population in your setting

*Mark only one oval.*

- Inner city
- Rural
- Mixed

**6. Socioeconomic status of the population in the adherence area***Mark only one oval.*

- Generally high
- Generally low
- Mixture of high and low SES
- Other: \_\_\_\_\_

**7. Type of hospital***Mark only one oval.*

- Academic
- Teaching
- Non-teaching

**8. Does your setting offer tertiary paediatric services (e.g. specialist consultants)?***Mark only one oval.*

- Yes
- No

**9. Please specify**

---

**10. Number of paediatric emergency visits annually**

---

**11. Number or percent of hospital admissions annually from the paediatric emergency department**

---

**12. Total number of inpatient beds for paediatric patients (medical and surgical combined) at your hospital**

---

**13. Is there a paediatric ICU at your hospital?***Mark only one oval.*

- Yes
- No

**14. Type of triage system used**

*Mark only one oval.*

- MTS
- CTCS
- ESI
- None
- Local system
- Other: \_\_\_\_\_

**15. Is the emergency department in your hospital mixed adult and pediatric ED or an ED with pediatric patients only?**

*Mark only one oval.*

- Mixed
- Paediatric only

**16. Comments**

---



---



---



---



---

**Physicians and referrals**

**17. During office hours the first medical person assessing a febrile child visiting the ED is a resident**

*Mark only one oval.*

|       |                       |                       |                       |                       |                       |        |
|-------|-----------------------|-----------------------|-----------------------|-----------------------|-----------------------|--------|
|       | 1                     | 2                     | 3                     | 4                     | 5                     |        |
| never | <input type="radio"/> | always |

**18. During office hours a febrile child is reviewed by or discussed with a senior doctor**

*Mark only one oval.*

|       |                       |                       |                       |                       |                       |        |
|-------|-----------------------|-----------------------|-----------------------|-----------------------|-----------------------|--------|
|       | 1                     | 2                     | 3                     | 4                     | 5                     |        |
| never | <input type="radio"/> | always |

**19. During office hours what is the background of the person in charge of a febrile child visiting the ED?**

*Check all that apply.*

- Paediatrician
- Emergency physician
- Pediatric emergency physician
- Other: \_\_\_\_\_

**20. During office hours a supervising specialist is available for**

*Mark only one oval.*

- Direct Supervision – the supervising physician is physically present onsite with the resident and patient.
- Indirect Supervision: (I) with direct supervision immediately available – the supervising physician is physically within the hospital and is immediately available to provide Direct Supervision.
- Indirect Supervision: (II) with direct supervision available – the supervising physician is not physically present within the hospital or other sites of patient care, but is immediately available by means of telephonic and/or electronic modalities, and is available to provide Direct Supervision in person within 20-30 minutes at all times.
- Oversight – the supervising physician is available to provide review of procedures/encounters with feedback provided after care is delivered.

**21. During out-of-office hours (evenings, nights, weekends) the first medical person assessing a febrile child visiting the ED is a resident**

*Mark only one oval.*

|       |                       |                       |                       |                       |                       |        |
|-------|-----------------------|-----------------------|-----------------------|-----------------------|-----------------------|--------|
|       | 1                     | 2                     | 3                     | 4                     | 5                     |        |
| never | <input type="radio"/> | always |

**22. During out-of-office hours a febrile child is reviewed by or discussed with a senior doctor**

*Mark only one oval.*

|       |                       |                       |                       |                       |                       |        |
|-------|-----------------------|-----------------------|-----------------------|-----------------------|-----------------------|--------|
|       | 1                     | 2                     | 3                     | 4                     | 5                     |        |
| never | <input type="radio"/> | always |

23. **During out-of-office hours what is the background of the person in charge of a febrile child visiting the ED?**

*Check all that apply.*

- Paediatrician ...%
- Emergency physician ...%
- Pediatric emergency physician ...%
- Other: \_\_\_\_\_

24. **During out-of-office hours a supervising specialist is available for:**

*Mark only one oval.*

- Direct Supervision – the supervising physician is physically present onsite with the resident and patient.
- Indirect Supervision: (I) with direct supervision immediately available – the supervising physician is physically within the hospital and is immediately available to provide Direct Supervision.
- Indirect Supervision: (II) with direct supervision available – the supervising physician is not physically present within the hospital or other sites of patient care, but is immediately available by means of telephonic and/or electronic modalities, and is available to provide Direct Supervision in person within 20-30 minutes at all times.
- Oversight – the supervising physician is available to provide review of procedures/encounters with feedback provided after care is delivered.

25. **Comments**

---

---

---

---

---

## Primary care and emergency services

26. **Which of the following pre-hospital emergency services are available in your catchment area**

Multiple answers possible

Check all that apply.

- Telephone consultation service (e.g. 111 in the UK)
- General practitioners
- Primary care paediatricians
- Out-of-office GP / primary care service
- Urgent care centres (usually run by nurse practitioners or non-paediatric doctors)
- None
- Other: \_\_\_\_\_

27. **What is approximately the percent of self-referrals visiting the ED?**

Mark only one oval.

- < 5%
- 5 - 10%
- 10 - 20%
- 20 - 50%
- 50 - 75%
- > 75%

28. **The majority of children visiting the ED has a primary care physician**

Mark only one oval.

- Yes
- No

29. **The primary care physician most often is a:**

Mark only one oval.

|                      | 1                     | 2                     | 3                     | 4                     | 5                     |                            |
|----------------------|-----------------------|-----------------------|-----------------------|-----------------------|-----------------------|----------------------------|
| General practitioner | <input type="radio"/> | Primary care paediatrician |

30. **Primary care physicians deliver acute primary care during office hours in the adherence area of your ED**

Mark only one oval.

- Yes
- No

**31. Primary care physicians deliver acute primary care during out-of-office hours in the adherence area of your ED**

*Mark only one oval.*

- Yes
- No

**32. Patients officially need a referral from their primary care physician to attend the ED**

*Mark only one oval.*

- Yes
- No

**33. Comments**

---



---



---



---



---

## Implementation of delidelines and immunization

**34. Which paediatric guidelines are implemented at your hospital**

*Mark only one oval per row.*

|                              | NICE                  | National              | Local                 | None                  |
|------------------------------|-----------------------|-----------------------|-----------------------|-----------------------|
| Children with fever          | <input type="radio"/> | <input type="radio"/> | <input type="radio"/> | <input type="radio"/> |
| Respiratory tract infections | <input type="radio"/> | <input type="radio"/> | <input type="radio"/> | <input type="radio"/> |
| Urinary tract infections     | <input type="radio"/> | <input type="radio"/> | <input type="radio"/> | <input type="radio"/> |
| Sepsis/meningitis            | <input type="radio"/> | <input type="radio"/> | <input type="radio"/> | <input type="radio"/> |

**35. National immunization coverage %**

---

**36. Which vaccines are part of the standard national immunization schedule that is provided to all children?**

*Check all that apply.*

- Diphtheria, Pertussis, Tetanus, Polio
- Measles, mumps & rubella (MMR)
- S.Pneumoniae / pneumococcal (PCV) (please specify in next question)
- Haemophilus influenzae type B (HIB)
- N. Meningococcus (please specify in next question)
- Hepatitis A
- Hepatitis B
- Rotavirus
- Influenza
- Tuberculosis (TBC)
- Tick-borne encephalitis (TBE)
- Varicella
- Other: \_\_\_\_\_

**37. Which pneumococcal immunization is part of the standard immunization schedule?**

*Check all that apply.*

- 13 subtypes
- 23 subtypes
- 10 subtypes
- Other: \_\_\_\_\_

**38. Which meningococcal immunization is part of the standard immunization schedule?**

*Check all that apply.*

- Men B
- Men C
- Men ACWY
- Other: \_\_\_\_\_

**39. Comments**

---

---

---

---

---



## Specialists

40. **Is there a paediatric haematology / oncology department at this hospital?**

*Mark only one oval.*

Yes

No

41. **How many patients with haematological malignancies are diagnosed on a yearly bases?**

---

42. **How many patients with haematological malignancies are in treatment on a yearly basis?**

---

43. **How many episodes of febrile neutropenia are seen on an annual basis?**

---

44. **Is there a paediatric rheumatology department at this hospital?**

*Mark only one oval.*

Yes

No

45. **How many patients are seen with autoinflammatory diseases on an annual basis?**

---

46. **How many patients are on biologicals on an annual basis?**

---

47. **Comments**

---

---

---

---

---

48. **Is there a paediatric stem cell transplant unit at this hospital?**

*Mark only one oval.*

- Yes      *Skip to question 48.*
- No      *Skip to question 54.*

*Skip to question 54.*

## **Stem cell patients**

49. **How many patients are being transplanted with a stem cell transplant on a yearly basis?**

---

50. **How many are haematology oncology?**

---

51. **How many are primary immunodeficiencies?**

---

52. **How many are other (e.g. autoimmune)?**

---

53. **How many episodes of suspected infection in stem cell patients are seen on an annual basis?**

---

54. **Comments**

---

---

---

---

---

## **Quality control variables - General characteristics**

**55. Are all patients at your ED registered?***Mark only one oval.*

- Yes
- No, please specify below

**56. Please specify**

---

---

---

---

---

**57. Do some patients go to the ICU directly without being seen at the ED?***Mark only one oval.*

- Yes
- No

**58. If yes, please specify how often this happens and which patients go directly to ICU**

---

---

---

---

---

**59. Who usually performs the initial triage?***Mark only one oval.*

- Triage nurse
- General nurse
- Nurse practitioner / physician assistant
- Physician
- Student
- Other: \_\_\_\_\_

**60. Can vital signs be estimated as normal instead of measured (for example in a well appearing child)?***Mark only one oval.*

- Yes
- No

**61. Comments**

---



---



---



---



---

**Data registration**

**62. How are the following items registered?**

*Mark only one oval per row.*

|                                                       | Paper chart           | Electronic chart      |
|-------------------------------------------------------|-----------------------|-----------------------|
| History and physical examination                      | <input type="radio"/> | <input type="radio"/> |
| Vital signs                                           | <input type="radio"/> | <input type="radio"/> |
| Diagnostic tests (e.g. labs, imaging)                 | <input type="radio"/> | <input type="radio"/> |
| Treatment (e.g. oxygen, medication)                   | <input type="radio"/> | <input type="radio"/> |
| Immediate life saving interventions (e.g. intubation) | <input type="radio"/> | <input type="radio"/> |
| Working and final diagnosis                           | <input type="radio"/> | <input type="radio"/> |
| Patient progress (admission, follow-up)               | <input type="radio"/> | <input type="radio"/> |

**63. Are diagnostic tests recorded in the chart during the ED stay?**

*Mark only one oval.*

- Yes, automatically
- Yes, manually during the ED visit
- No, manually after the ED visit
- No, not at all
- Other: \_\_\_\_\_

**64. Are diagnostic tests recorded in the chart complete?**

*Mark only one oval.*

- Yes
- No
- Other: \_\_\_\_\_

**65. Is treatment (e.g. oxygen, antibiotics), recorded in the chart during the ED stay?***Mark only one oval.*

- Yes, automatically
- Yes, manually during the ED visit
- No, manually after the ED visit
- No, not at all
- Other: \_\_\_\_\_

**66. Is treatment that is recorded in the chart complete?***Mark only one oval.*

- Yes
- No
- Other: \_\_\_\_\_

**67. Are immediate life saving interventions (e.g. intubation), recorded in the chart during the ED stay?***Mark only one oval.*

- Yes, automatically
- Yes, manually during the ED visit
- No, manually after the ED visit
- No, not at all
- Other: \_\_\_\_\_

**68. Are immediate life saving interventions that are recorded in the chart complete?***Mark only one oval.*

- Yes
- No
- Other: \_\_\_\_\_

**69. Are patient outcome and follow-up recorded in the chart during the ED stay?***Mark only one oval.*

- Yes, automatically
- Yes, manually during the ED visit
- No, manually after the ED visit
- No, not at all
- Other: \_\_\_\_\_

**70. Is patient outcome and follow-up that is recorded in the chart complete?***Mark only one oval.*

- Yes
- No
- Other: \_\_\_\_\_

**71. Comments**

---

---

---

---

---

**Diagnostics (e.g. labs, imaging)****72. Is temperature measured routinely in all febrile children***Mark only one oval.*

- Yes
- No
- Other: \_\_\_\_\_

**73. How is the temperature measured in general?***Mark only one oval.*

- Oral
- Rectal
- Tympanic (ear)
- Axillary
- Temporal (forehead)
- Other: \_\_\_\_\_

**74. Who usually takes finger prick / finger stick blood samples (e.g. for blood sugar)?***Mark only one oval.*

- Nurse
- Nurse practitioner / physician assistant
- Physician
- Phlebotomist / lab worker
- Student
- Other: \_\_\_\_\_

**75. Who usually takes venous blood samples?**

*Mark only one oval.*

- Nurse
- Nurse practitioner / physician assistant
- Physician
- Phlebotomist / lab worker
- Student
- Other: \_\_\_\_\_

**76. Who usually takes swabs/NPAs (nasopharyngeal aspirate)**

*Mark only one oval.*

- Nurse
- Nurse practitioner / physician assistant
- Physician
- Student
- Other: \_\_\_\_\_

**77. What point of care tests are available in the Emergency department?**

Multiple answers possible

*Check all that apply.*

- Blood sugar
- Urinalysis
- NPA (nasopharyngeal aspirate) for respiratory virus
- Blood gases / lactate
- CRP
- Other: \_\_\_\_\_

**78. If NPA for respiratory virus is available, please specify**

\_\_\_\_\_

**79. Comments**

\_\_\_\_\_  
 \_\_\_\_\_  
 \_\_\_\_\_  
 \_\_\_\_\_  
 \_\_\_\_\_

**Patient outcome and follow-up**

**80. Who documents the working diagnosis at the end of the ED visit?**

Mark only one oval.

- physician  
 nurse

**81. Is hospitalization > 24 uur mainly (> 90 %) for medical reasons ?**

Mark only one oval.

- Yes  
 No  
 Other: \_\_\_\_\_

**82. Are children admitted to the ward if the stay at the ED takes longer than advised by triage guidelines?**

Mark only one oval.

- Yes  
 No  
 Other: \_\_\_\_\_

**83. How long are children allowed to stay at the ward until guidelines state that they have to be admitted?**

\_\_\_\_\_

**84. Please specify which are reasons for ICU admission at your hospital**

Check all that apply.

- Continuous monitoring of vital signs  
 Non-rebreathing mask  
 High flow oxygen such as optiflow  
 Non-invasive ventilation  
 Mechanical ventilation  
 Tracheal cannula  
 Use of inotropes  
 Not enough beds at the regular departments  
 Use of a central line (for treatment other than inotropes)  
 Continuous intravenous antiepileptic drugs  
 Other: \_\_\_\_\_



85. **How often are paediatric patients admitted to the PICU for other reasons (e.g. not enough beds at the regular department)**

Mark only one oval.

1      2      3      4      5

---

very infrequent                  very frequent

---

86. **Is mortality at ED reported in the patient ED file?**

Mark only one oval.

Yes

No

Other: \_\_\_\_\_

87. **If patient characteristics, diagnostics, treatment or outcome are recorded retrospectively in the chart, what could be a reason for this?**

Check all that apply.

Urgency of the patient

ED crowding

Other: \_\_\_\_\_

88. **Comments.**

---

---

---

---

---

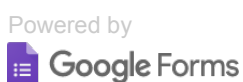

Supplement: bmjpo-2019-000456supp002.pdf [file bmjpo-2019-000456supp002.pdf]
